# Supplementary material for: In Silico and In Vivo Evaluation of the Maqui Berry (Aristotelia chilensis (Mol.) Stuntz) on Biochemical Parameters and Oxidative Stress Markers in a Metabolic Syndrome Model
Source: MDPI journal article supplement (doi:10.3390/metabo13121189), 2023-12-07
Supplement: s1 [file s1]

Supplementary Figure S1

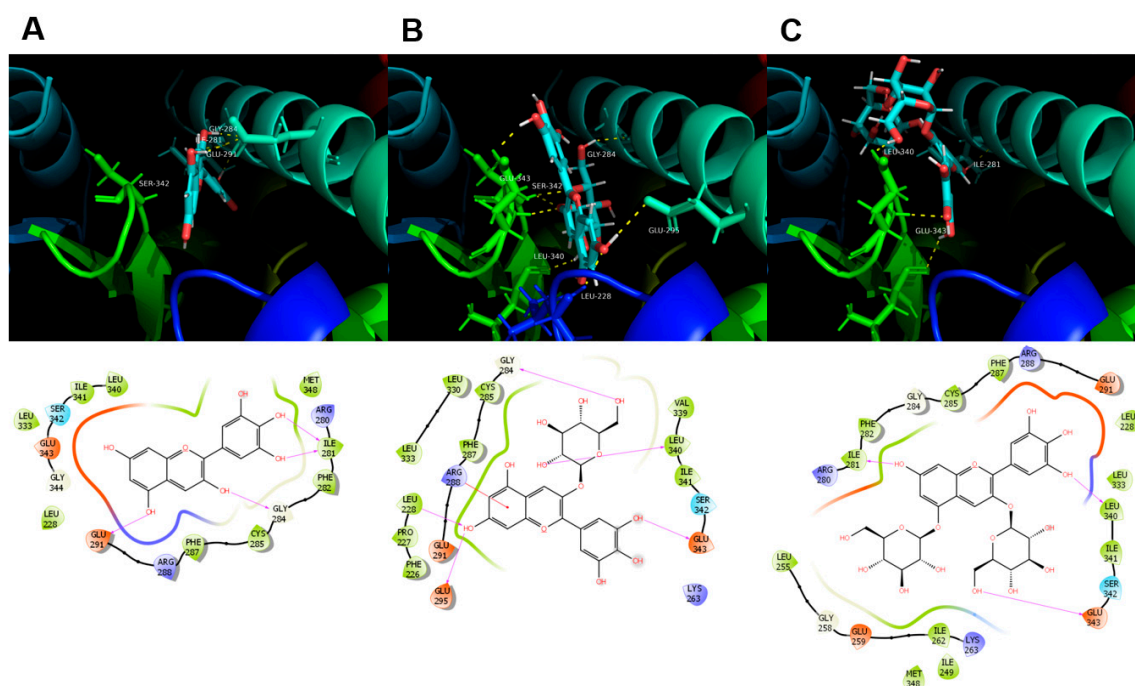

Supplementary Figure S2

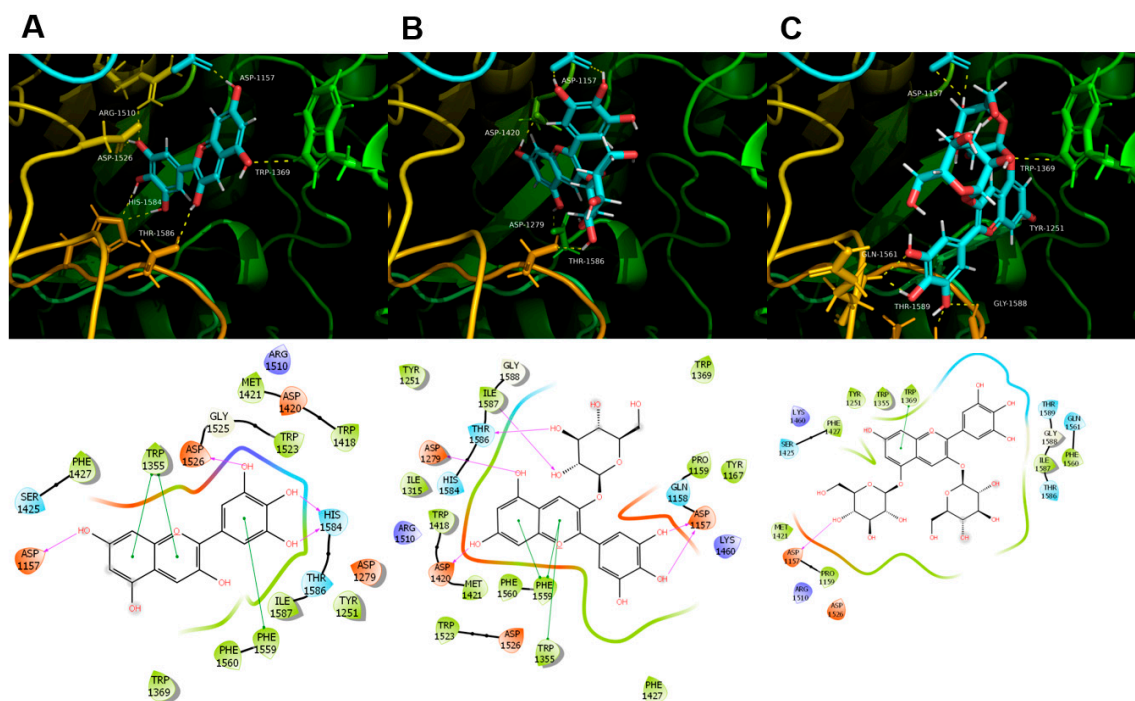

Supplementary Figure S3

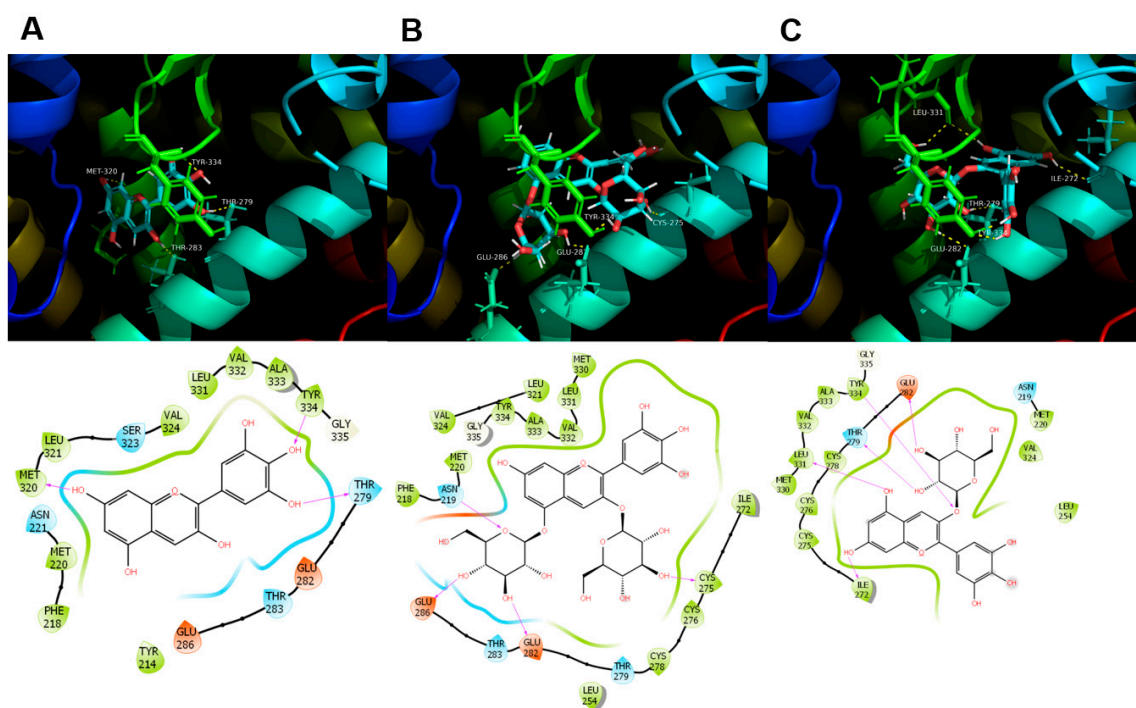

Supplementary Figure S4

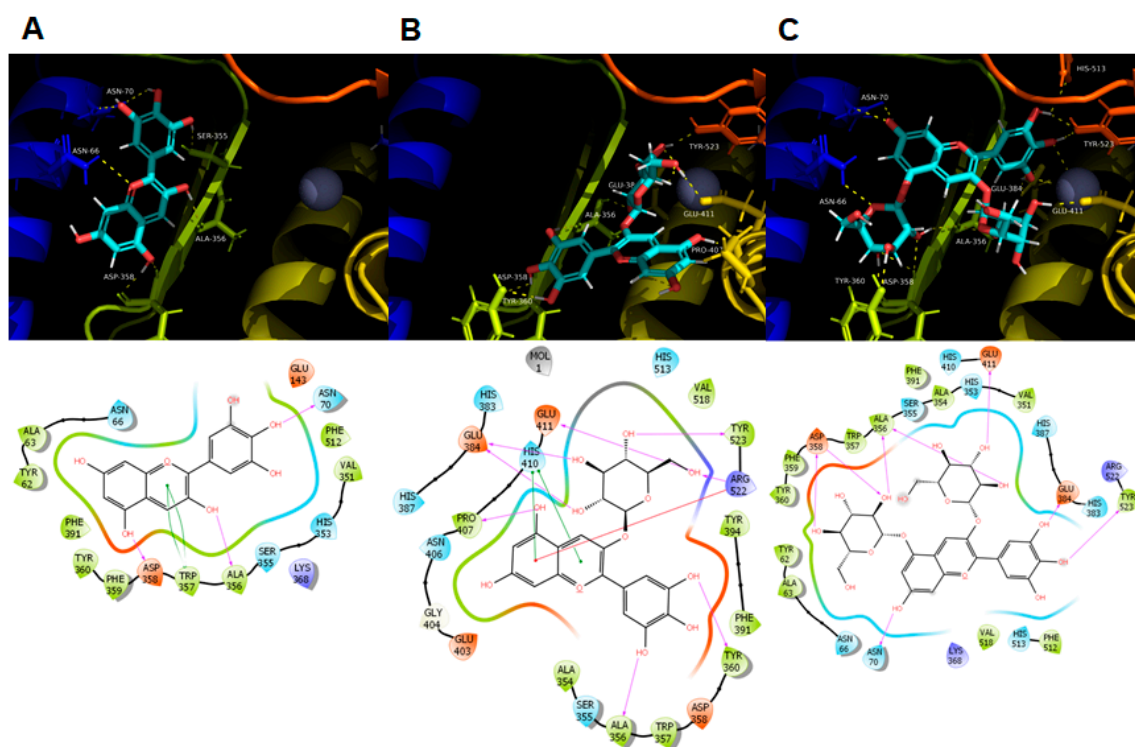

## Supplementary Figure S5

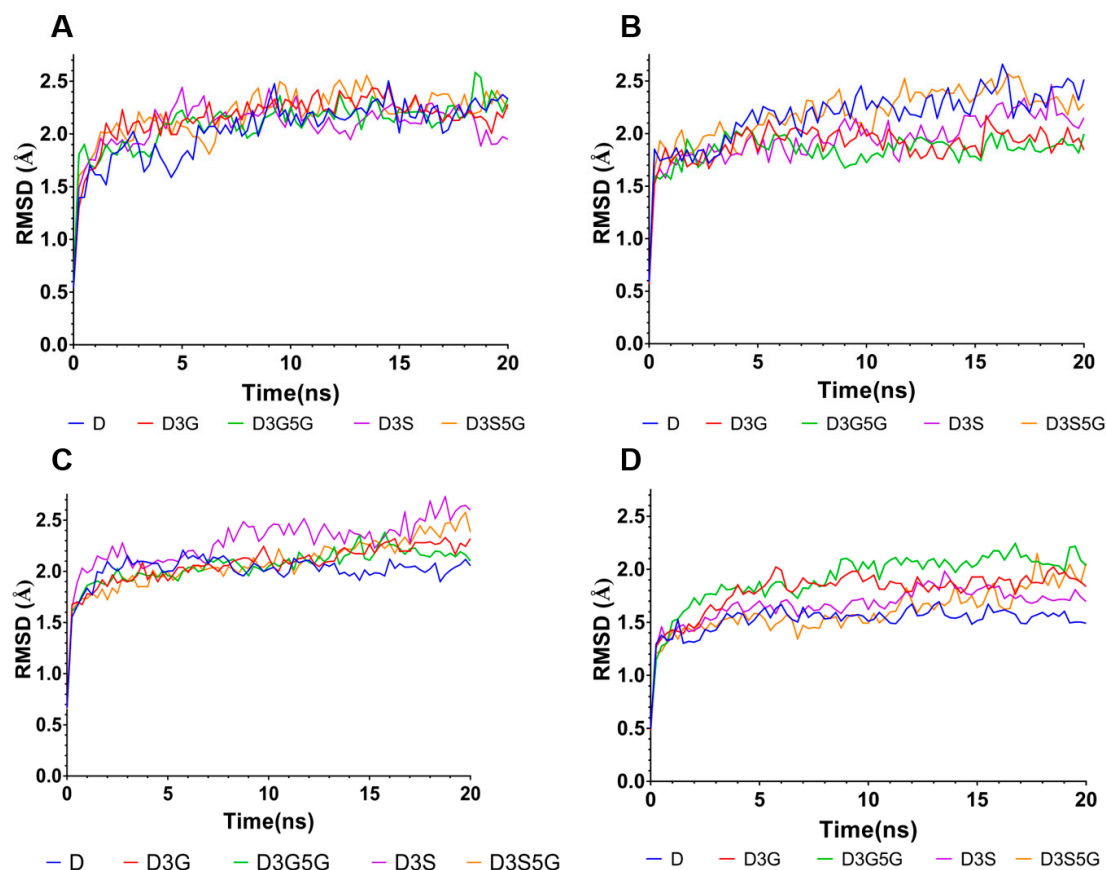

## Figure Legends (Supplementary Figures)

**Figure S1(SI).** Predicted poses of (a) **D**, (b) **D3G**, and (c) **D3G5G** in the active site of the PPAR-g ligand-binding domain. Non-polar amino acids are colored in green, polar residues in cyan, basic in blue, and acid in red. Hydrogen bond interactions are depicted as arrows and  $\pi$ - $\pi$  or  $\pi$ -cation interactions as dot-ended lines.

**Figure S2(SI).** Predicted poses of (a) **D**, (b) **D3G**, and (c) **D3G5G** in the active site of the  $\alpha$ -glucosidase. See Figure 1-SI for coloring interpretation.

**Figure S3(SI).** Predicted poses of (a) **D**, (b) **D3G**, and (c) **D3G5G** in the LBD of PPAR- $\alpha$ . See Figure 1-SI for coloring interpretation.

**Figure S4(SI).** Predicted poses of (a) **D**, (b) **D3G**, and (c) **D3G5G** in the active site of the  $\alpha$ -glucosidase. See Figure 1-SI for coloring interpretation.

**Figure S5(SI).** RMSD variations during MD simulation of delphinidin and its glycosylated derivatives complexes with (a) PPAR- $\alpha$ , (b) PPAR- $\gamma$ , and (c)  $\alpha$ -glucosidase.
